# Supplementary material for: Biologically synthesized silver nanoparticle-based colorimetric sensor for the selective detection of Zn2+
Source: Royal Society of Chemistry journal article supplement (doi:10.1039/c5ra17055a), 2015-01-01
Supplement: c5ra17055a1.pdf [file c5ra17055a1.pdf]

Electronic supplementary information

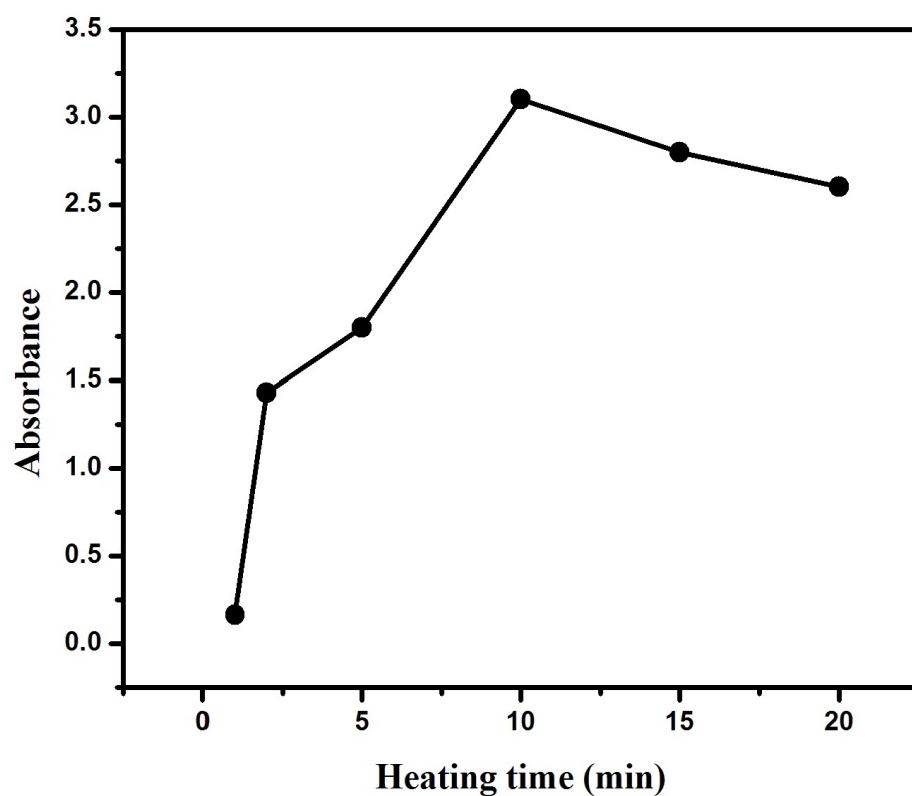

**Figure S1.** Effect of heating time on the absorption intensity of green synthesized silver nanoparticles

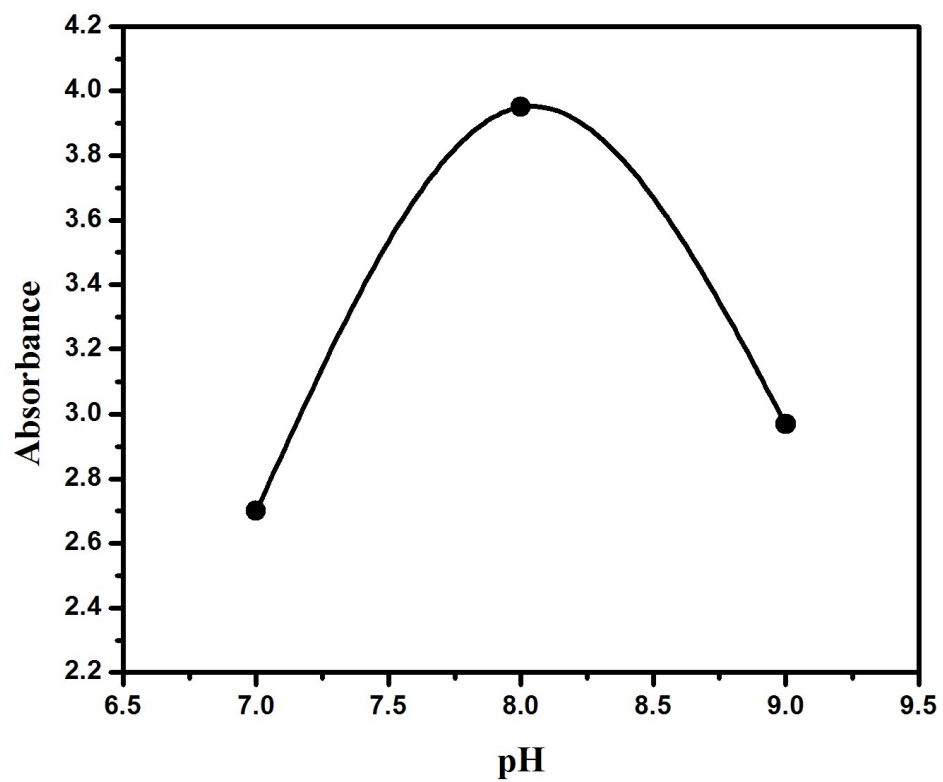

**Figure S2.** Effect of pH on the absorption intensity of green synthesized silver nanoparticles

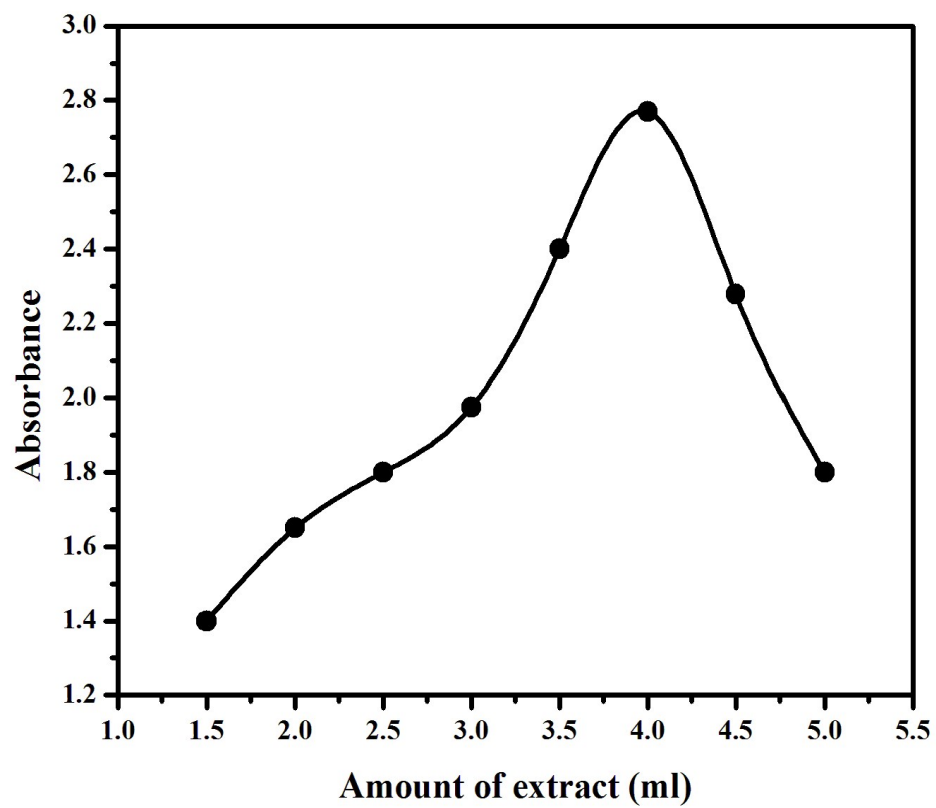

**Figure S3.** Effect of the amount of plant extract on the absorption intensity of silver nanoparticles

(A)

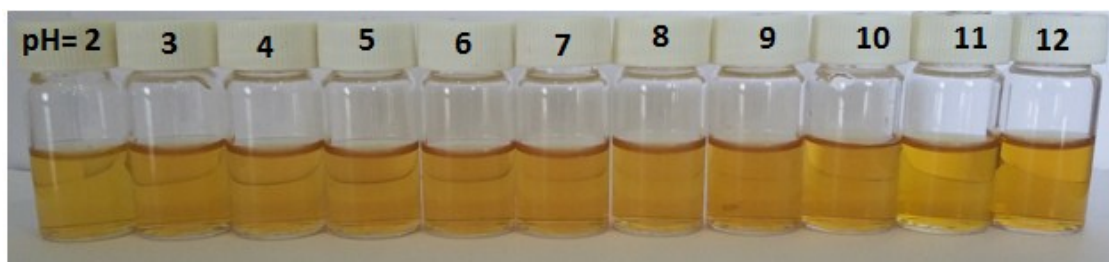

(B)

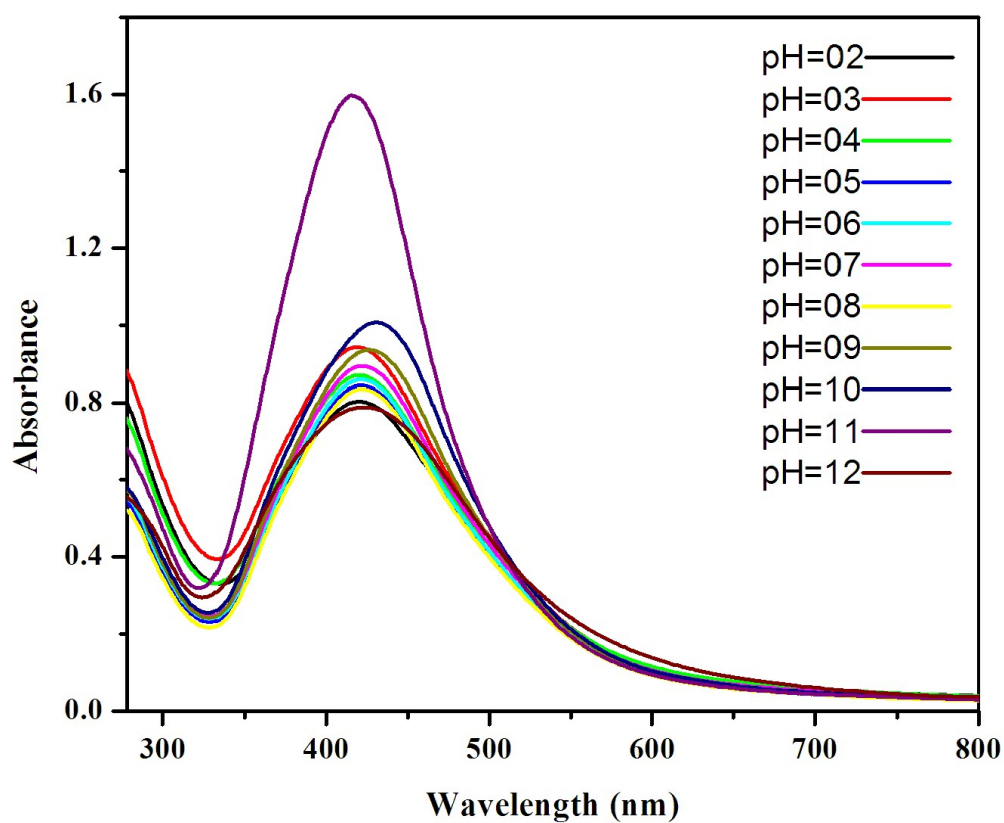

**Figure S4.** (A) Photograph of AgNPs solution at various pH. (B) Corresponding UV absorption spectra of the AgNPs solution recorded at different pH (2 –12). 1 ml of AgNPs solution was diluted upto 10 ml deionized water.

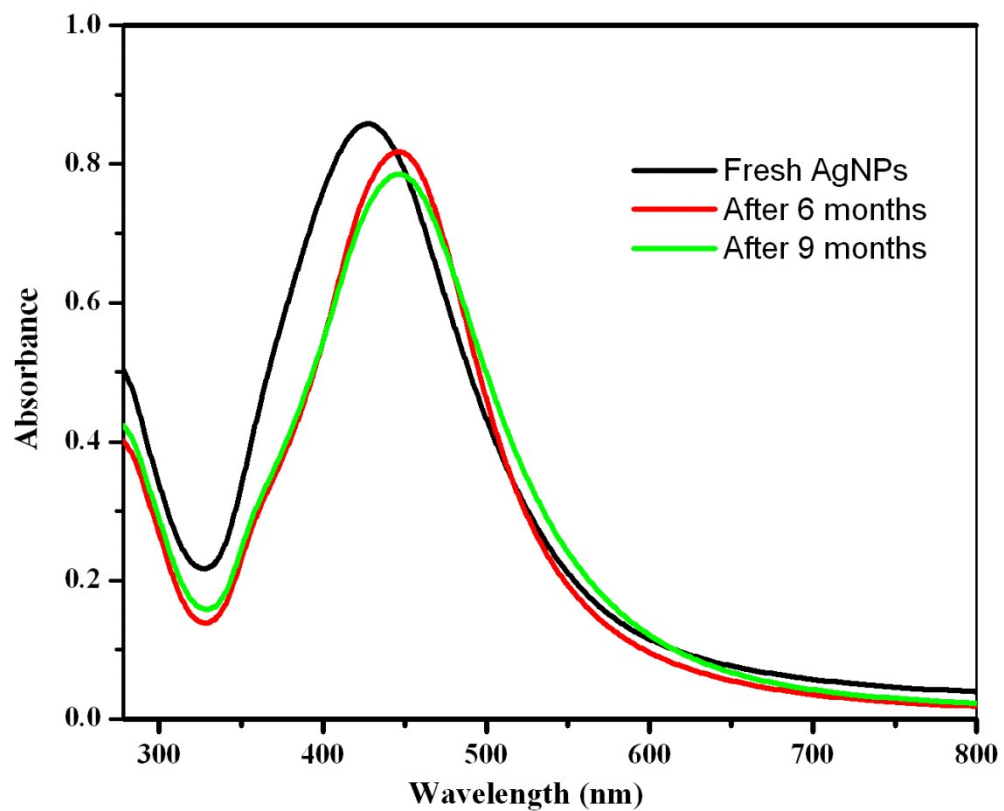

**Figure S5.** UV absorption spectra of AgNPs showing the stability with time.

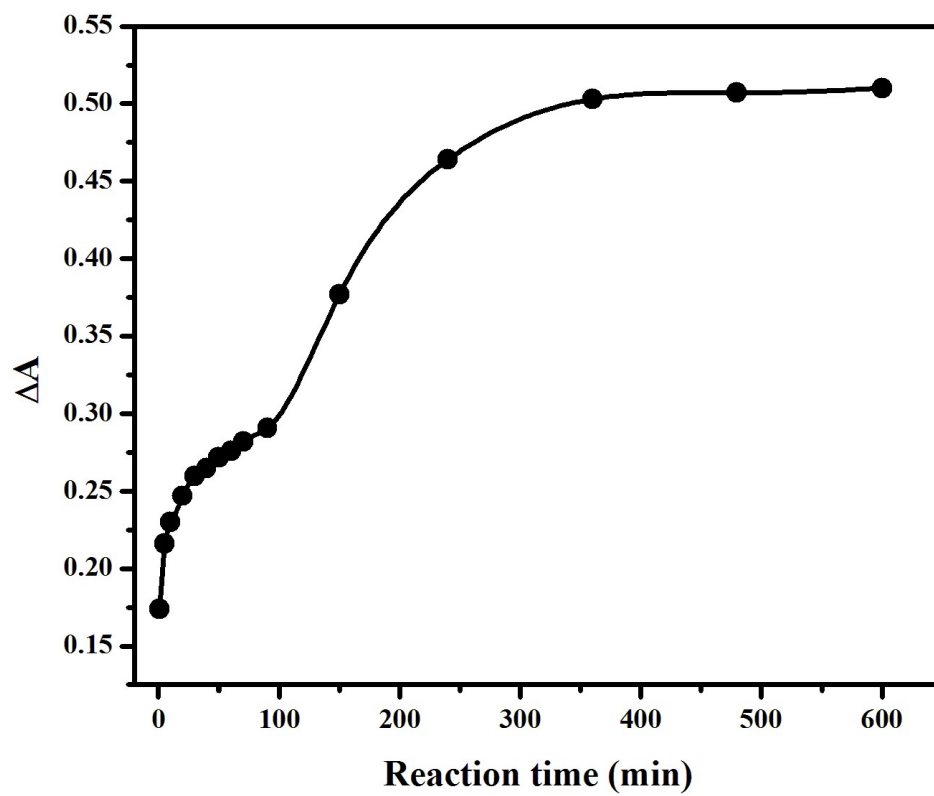

**Figure S6.** Effect of reaction time on the change of absorption intensity of silver nanoparticles solution upon the addition of  $1 \times 10^{-4}$  M  $\text{Zn}^{2+}$
